# Supplementary material for: Optical properties and molecular differences in dissolved organic matter at the Bermuda Atlantic and Hawai'i ALOHA time-series stations
Source: Royal Society of Chemistry journal article supplement (doi:10.1039/d3va00361b), 2024-01-01
Supplement: d3va00361b1.pdf [file d3va00361b1.pdf]

### Supplementary Online Material

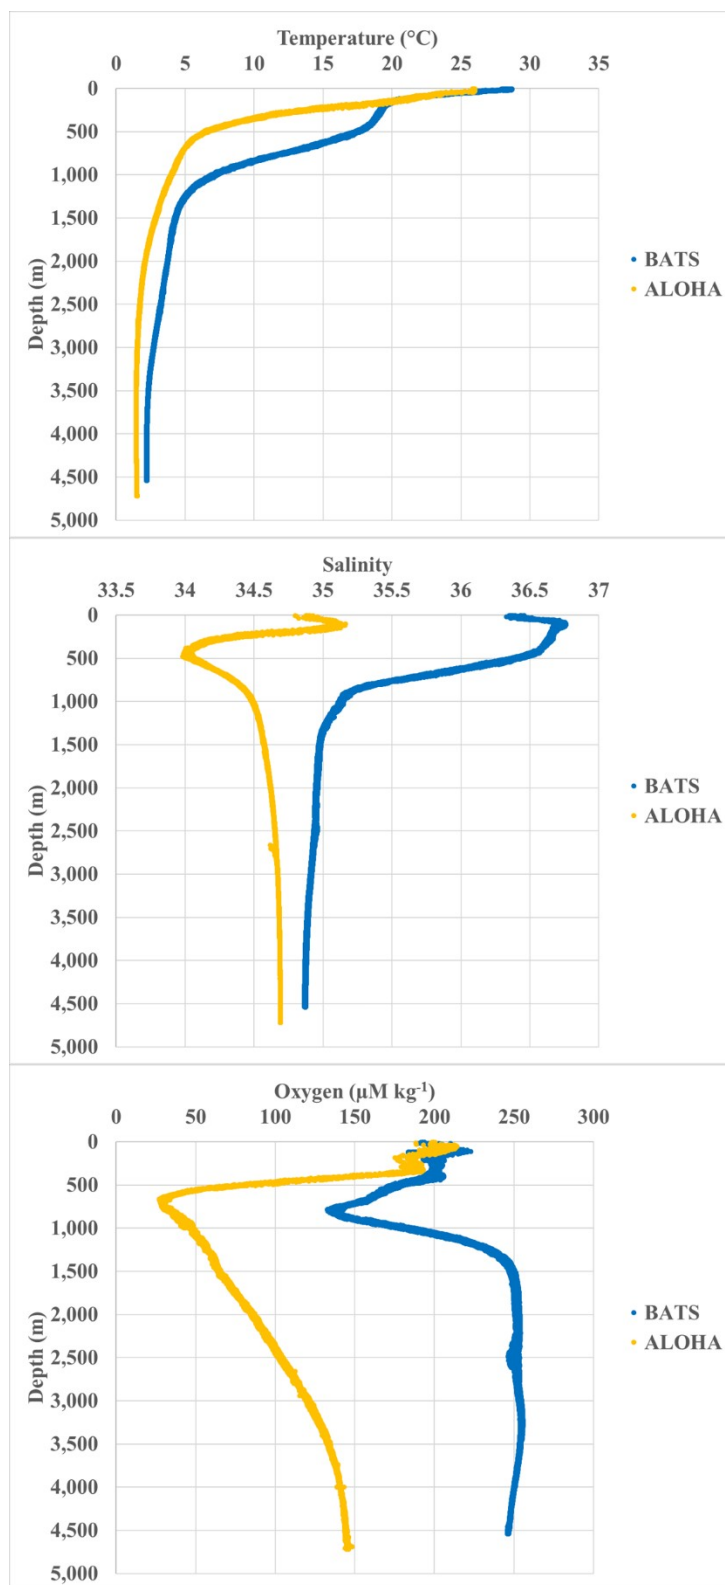

Figure S1: Comparing station BATS in the Atlantic (blue) and ALOHA in the Pacific (yellow) water column CTD profiles. Temperature (top panel), Salinity (center panel), and oxygen concentrations (bottom panel) .

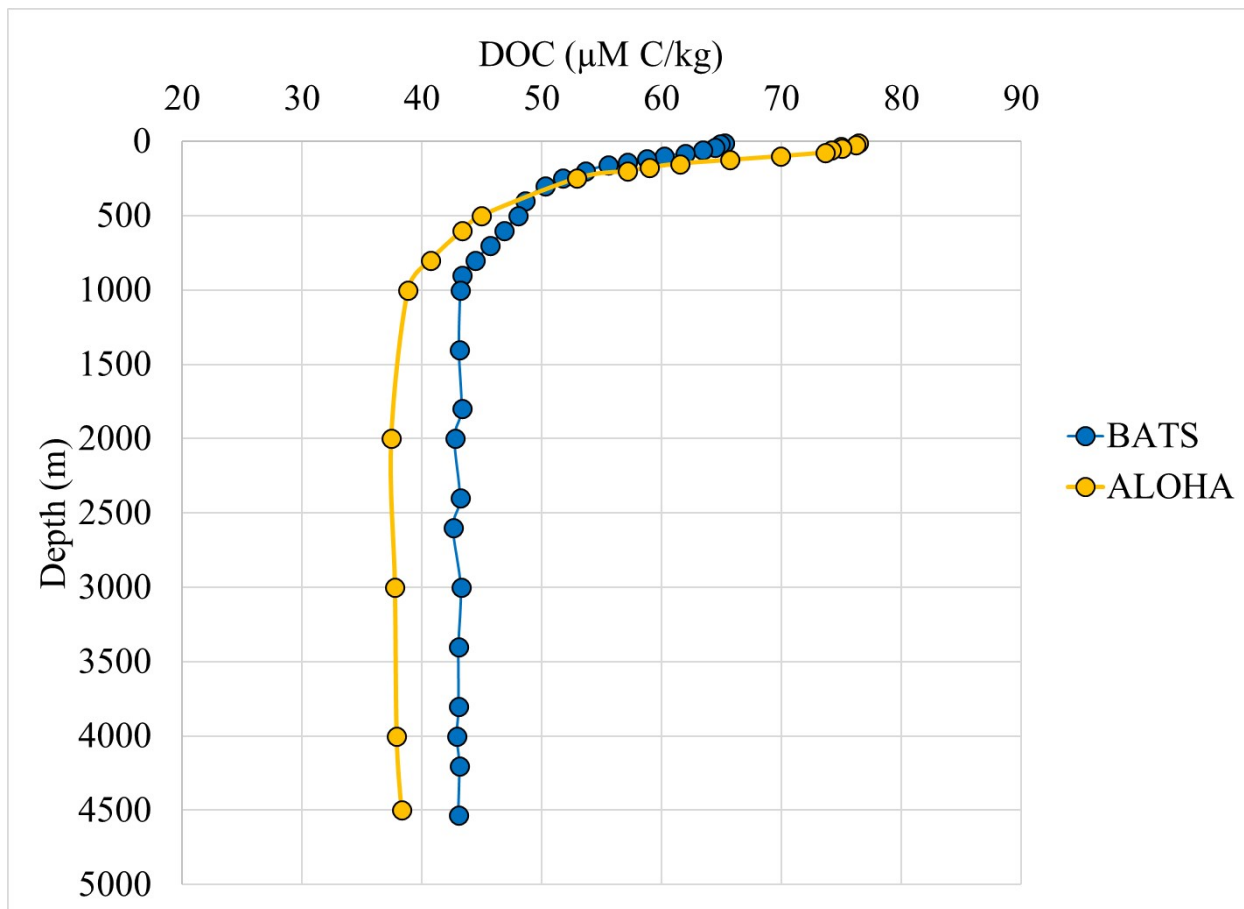

Figure S2: Historic DOC data based on long-term monitoring data at station ALOHA and BATS. *BATS data source: Johnson, R. (2019) Niskin bottle water samples and CTD measurements at water sample depths collected at Bermuda Atlantic Time-Series sites in the Sargasso Sea ongoing from 1955-01-29 (BATS project). Biological and Chemical Oceanography Data Management Office (BCO-DMO). ALOHA data source: Hawaii Ocean Time-series HOT-DOGS application; University of Hawai'i at Mānoa. National Science Foundation Award # 1756517.*

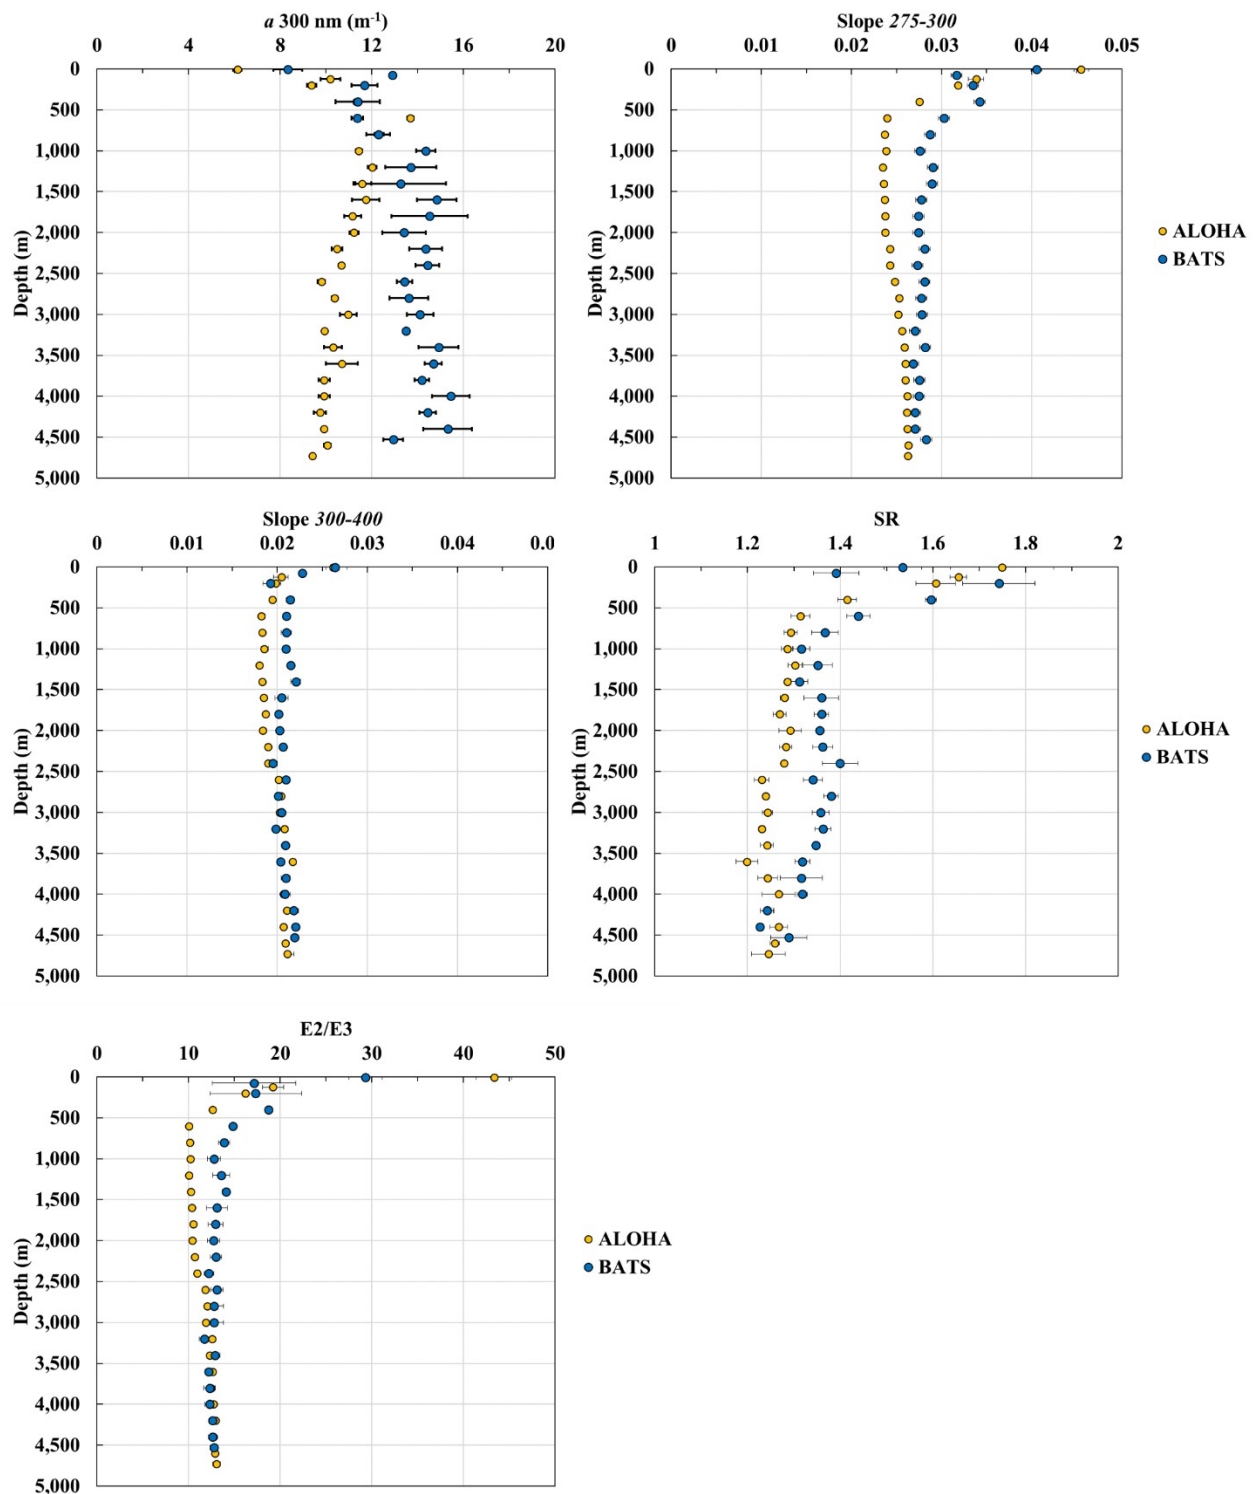

Figure S3: Depth profiles of the ALOHA and BATS optical parameters analyzed using PPL SPE-DOM (A) absorption coefficient at 300 nm ( $a(300)$ ); spectral slopes (B)  $S_{275-295}$ , and (C)  $S_{350-400}$ ; (D) spectral slope ratio SR ( $S_{275-295}/S_{350-400}$ ); and (E) absorption ratio E2/E3 ( $a(250)/a(365)$ ).

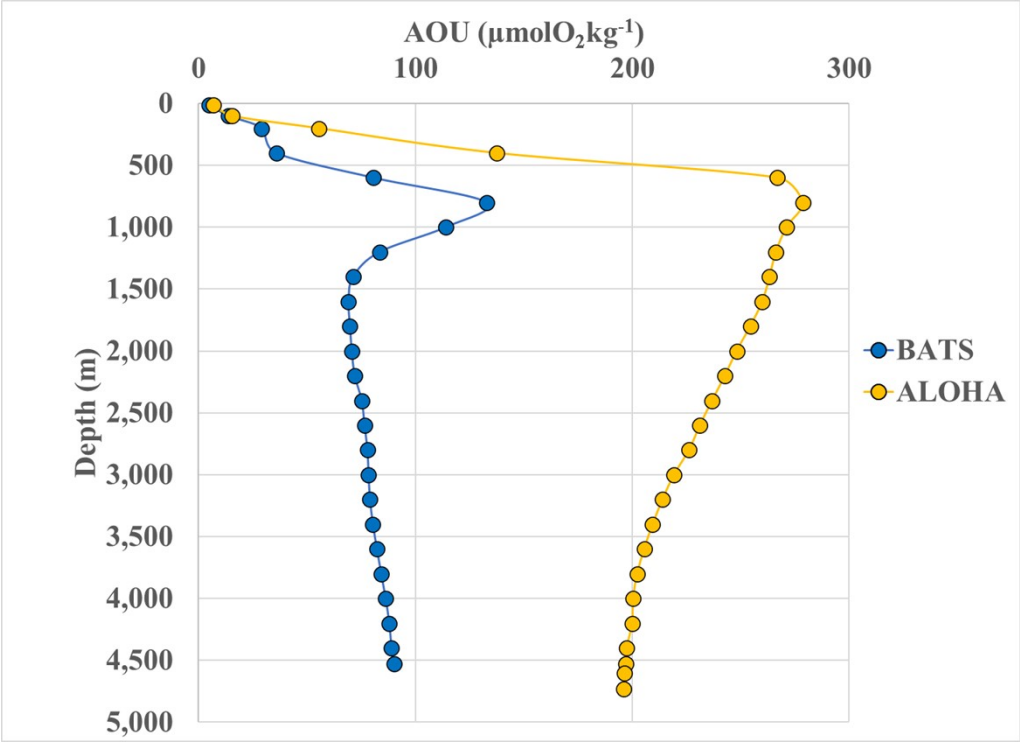

Figure S4: Depth profiles of apparent oxygen utilization (AOU) at station BATS in 2019 and ALOHA in 2021.

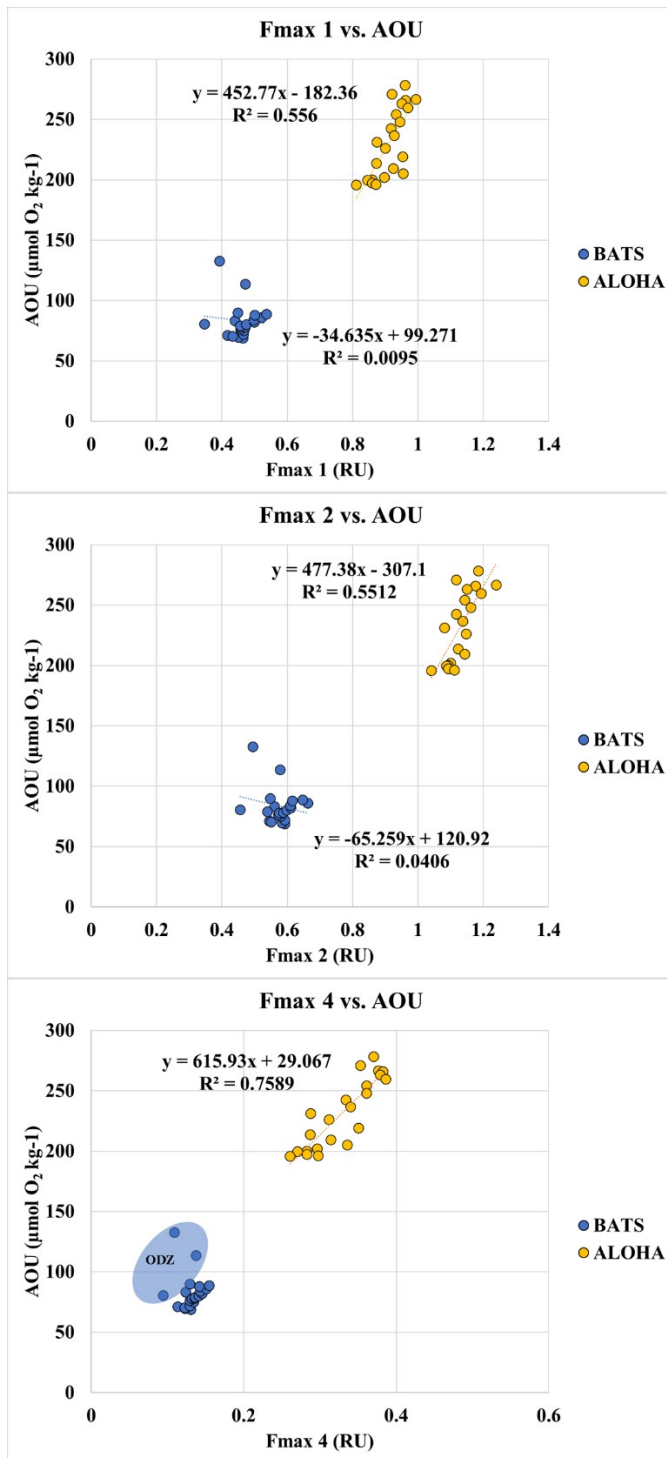

Figure S5: Linear regression analyses of apparent oxygen utilization (AOU) and EEM-PARAFAC components at station BATS 2019 and Aloha 2021. Note: blue circle highlights samples within the oxygen deficiency zone (ODZ) at BATS.

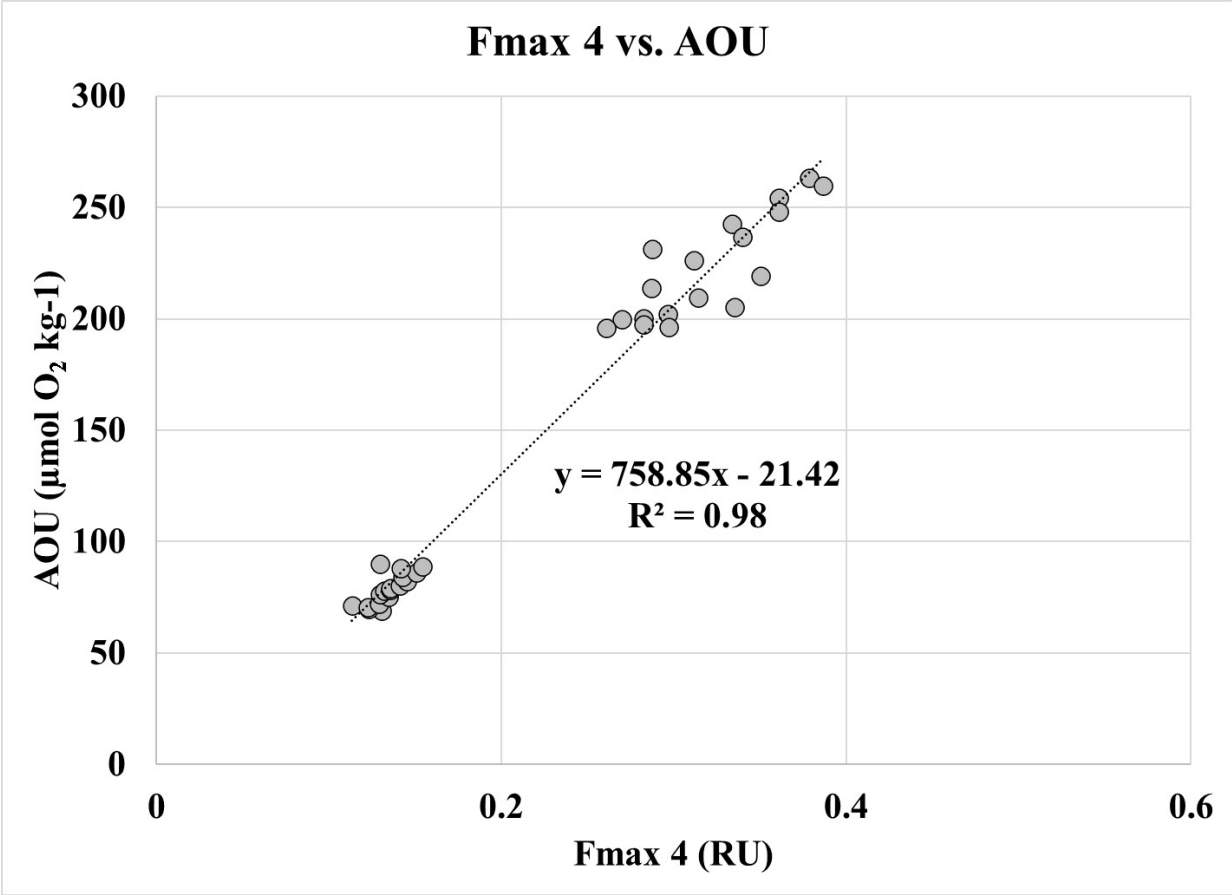

Figure S6: Linear regression analyses of apparent oxygen utilization (AOU) and EEM-PARAFAC component Fmax 4 (493nm) for all samples below 1,200 m depth.

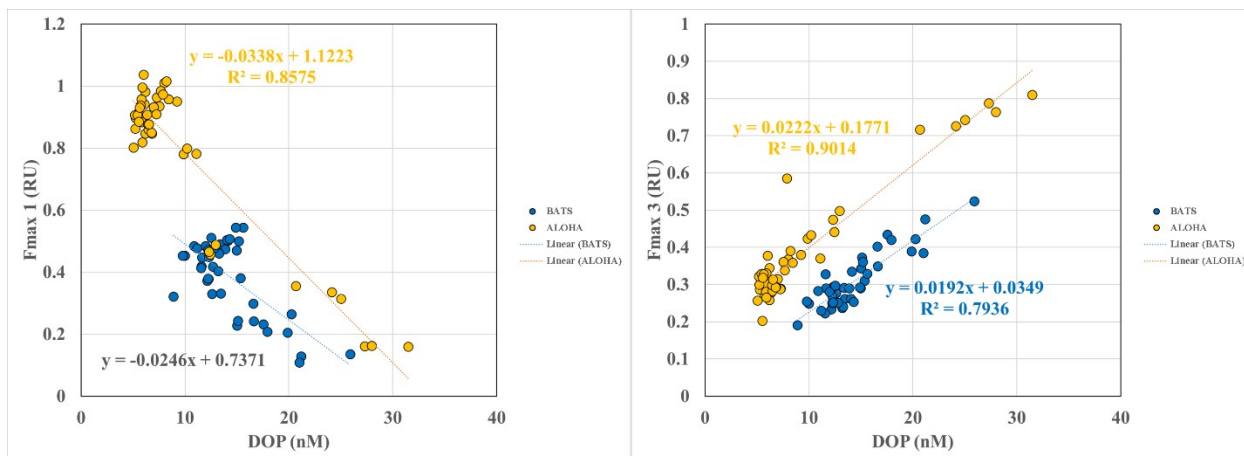

Figure S7: Dissolved organic phosphorus (DOP) concentrations (nM) vs FDOM<sub>H</sub> component Fmax1 (left) and FDOM<sub>P</sub> component Fmax3 (right) in SPE-DOM samples collected at BATS (blue dots) and ALOHA (yellow dots). The yellow line is the linear regression between Fmax values and DOP at ALOHA.

Figure S8: Hierarchical clustering of all common HRMS signatures.

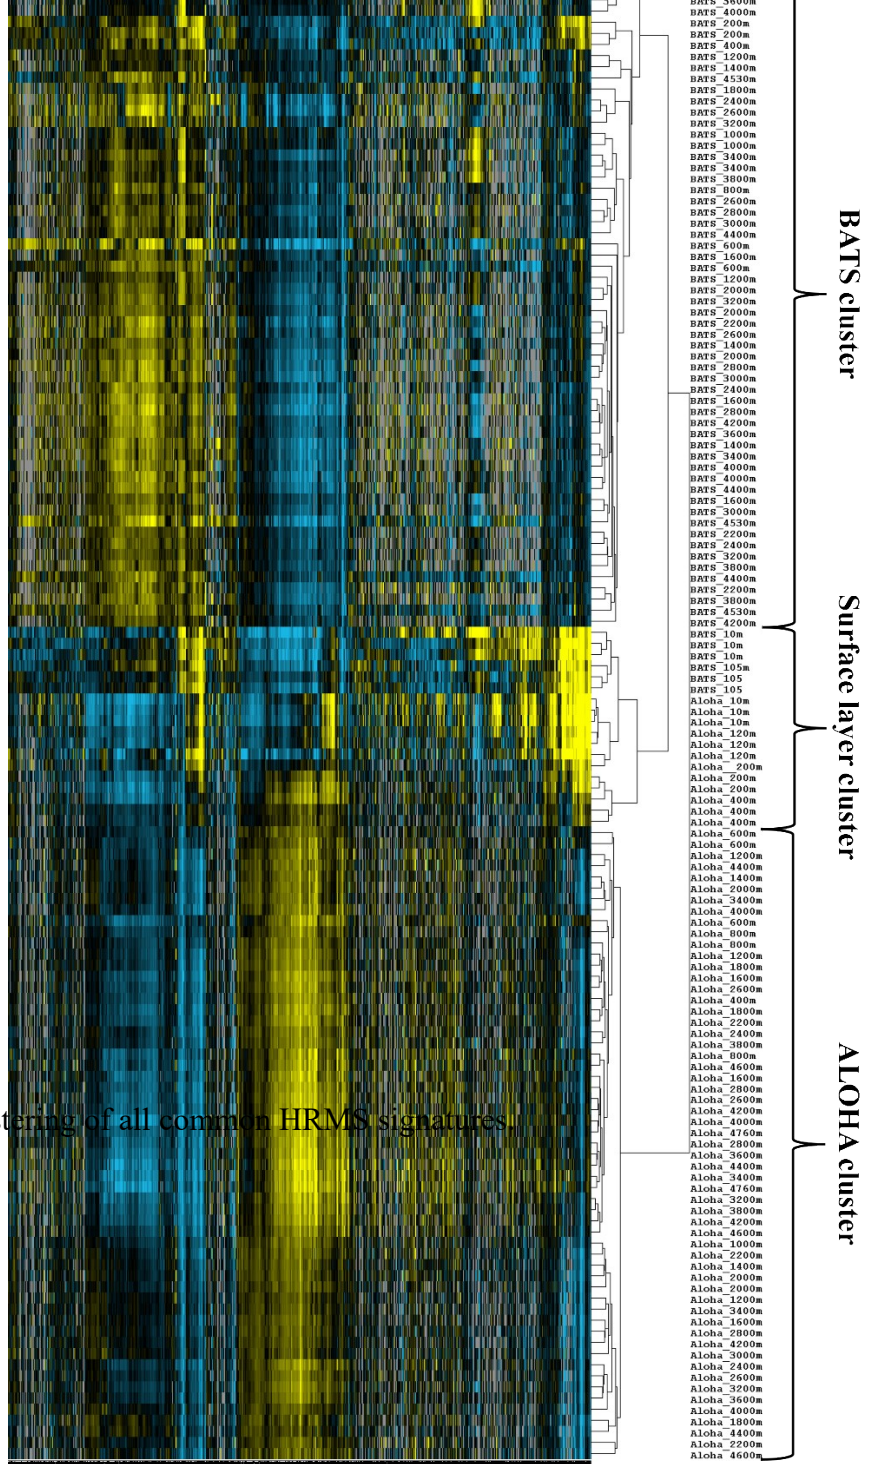



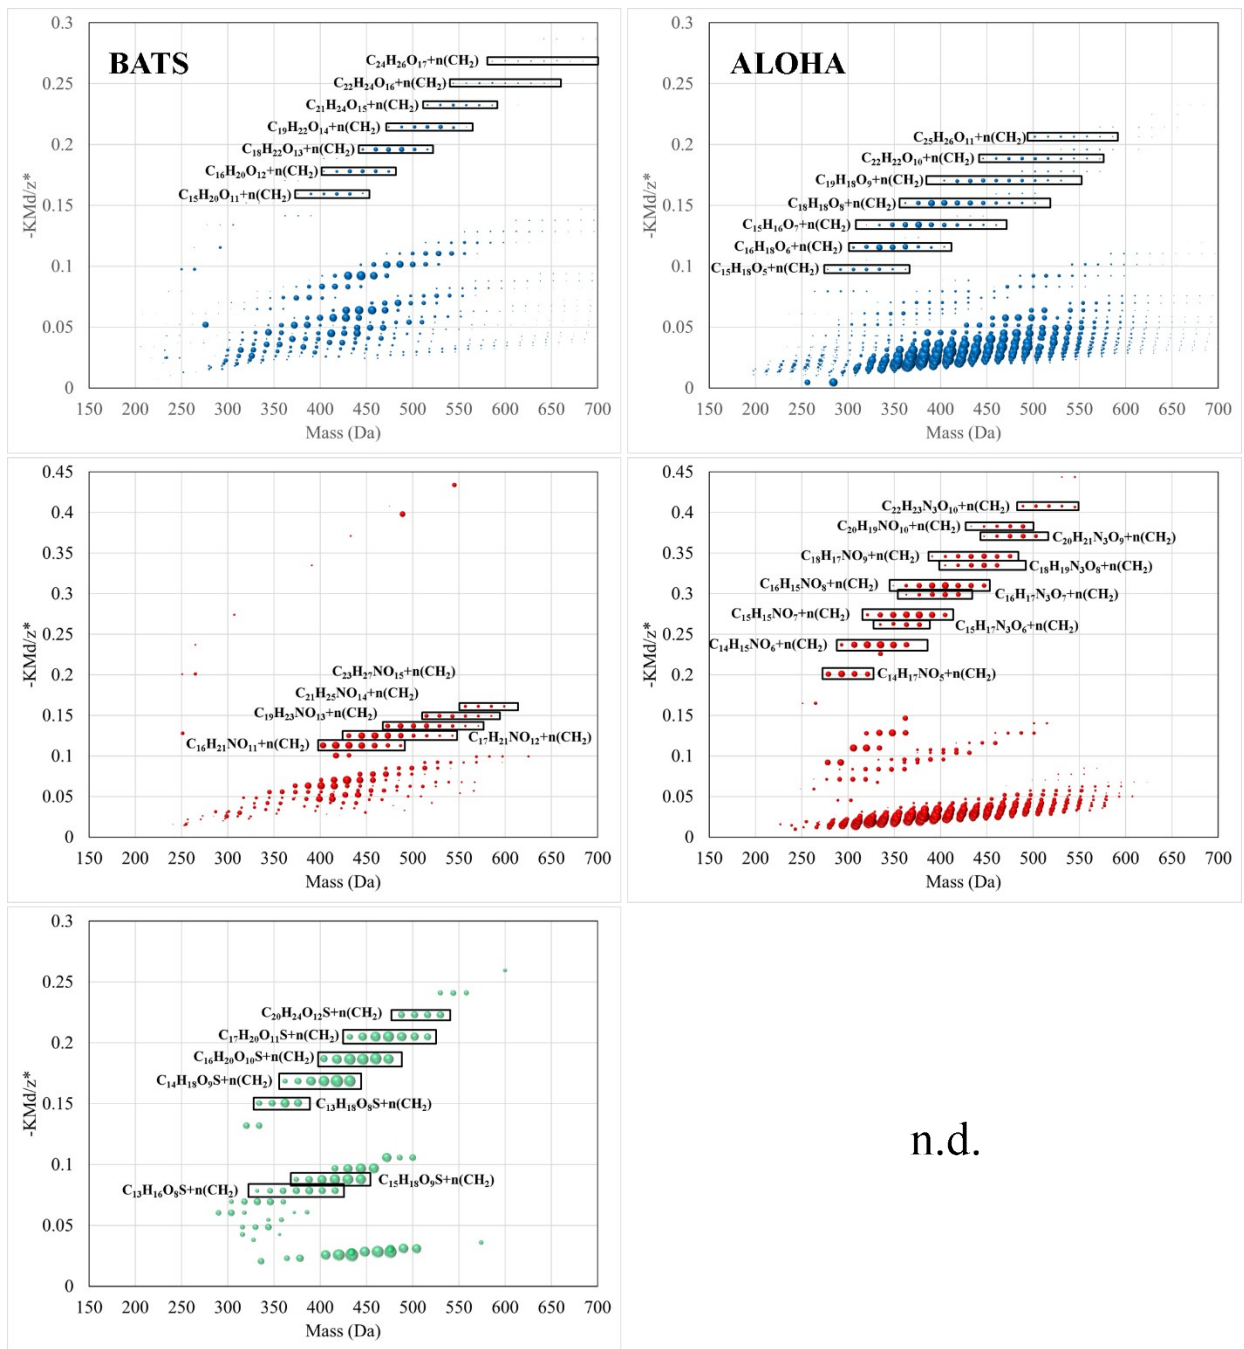

Figure S9: Mass-edited  $kmd/z^*$  plots of fundamental abundance differences amongst common molecular signatures at BATS (left panels) and ALOHA (right panels). Note: blue color corresponds to CHO, red to CHNO and green to CHOS signatures; bubble size indicates relative abundance within each pool.

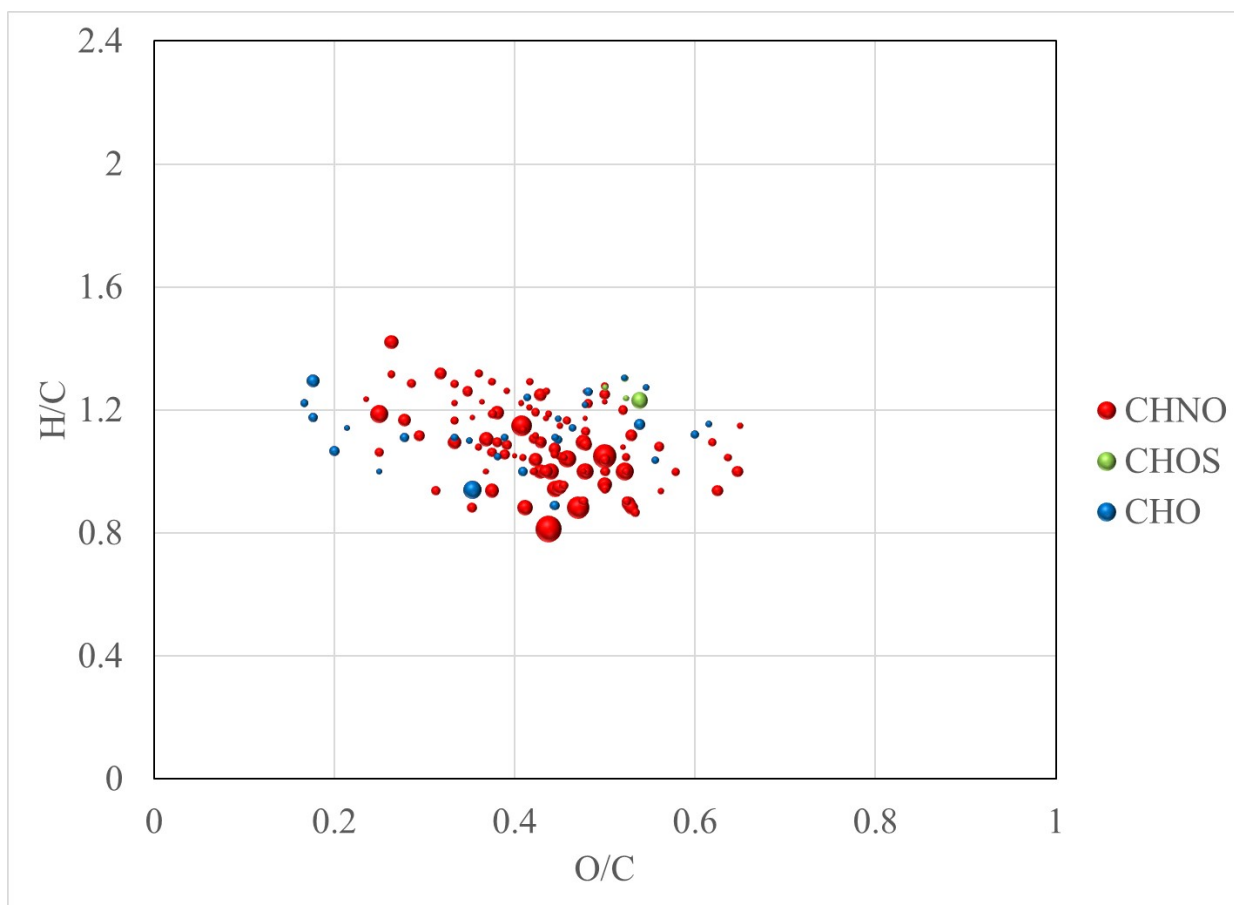

Figure S10: SOFAR analysis of the correlation between FTMS and the humic-like components of the EEM-PARAFAC data depicted in van Krevelen space. Note: bubble size corresponds to the loading from the SOFAR analysis.

Table S1: Linear Regressions between PARAFAC components (Fmax1, 2, 3, and 4) and DOP, DOS, and S:P ratios in PPL SPE DOM samples. R<sup>2</sup> values ≥0.9 are highlighted in yellow, those <0.9 but ≥0.70 are highlighted in green, and those <0.70 but ≥0.5 are highlighted in blue.

|                      | <i>ALOHA</i>   |                | <i>BATS</i>    |                |
|----------------------|----------------|----------------|----------------|----------------|
|                      | Slope          | R <sup>2</sup> | Slope          | R <sup>2</sup> |
| <i>Fmax1 vs. DOP</i> | -0.034 ± 0.002 | 0.86           | 0.004 ± 0.007  | 0.01           |
| <i>Fmax2 vs. DOP</i> | -0.035 ± 0.002 | 0.86           | 0.014 ± 0.009  | 0.06           |
| <i>Fmax3 vs. DOP</i> | 0.022 ± 0.001  | 0.90           | 0.036 ± 0.005  | 0.51           |
| <i>Fmax4 vs. DOP</i> | -0.013 ± 0.001 | 0.68           | 0.001 ± 0.002  | 0.01           |
| <i>Fmax1 vs. DOS</i> | -0.010 ± 0.001 | 0.54           | 0.000 ± 0.001  | 0.00           |
| <i>Fmax2 vs. DOS</i> | -0.010 ± 0.001 | 0.52           | 0.001 ± 0.001  | 0.02           |
| <i>Fmax3 vs. DOS</i> | 0.007 ± 0.001  | 0.64           | 0.004 ± 0.001  | 0.34           |
| <i>Fmax4 vs. DOS</i> | -0.004 ± 0.001 | 0.45           | 0.000 ± 0.000  | 0.00           |
| <i>Fmax1 vs. S:P</i> | 0.105 ± 0.009  | 0.74           | -0.039 ± 0.033 | 0.03           |
| <i>Fmax2 vs. S:P</i> | 0.106 ± 0.010  | 0.71           | -0.062 ± 0.043 | 0.05           |
| <i>Fmax3 vs. S:P</i> | -0.068 ± 0.006 | 0.76           | 0.036 ± 0.005  | 0.51           |
| <i>Fmax4 vs. S:P</i> | 0.042 ± 0.005  | 0.63           | -0.008 ± 0.009 | 0.02           |

Table S2: Assigned molecular formulae of WAX SPE-DOM and their abundances in total ion counts (TIC).

| (M-H)-   | M        | mass error (ppm) | Formulae  | BATS surface (TIC) | ALOHA surface (TIC) | BATS 2000 m depth (TIC) | ALOHA 2000 m depth (TIC) |
|----------|----------|------------------|-----------|--------------------|---------------------|-------------------------|--------------------------|
| 383.0983 | 384.1056 | 0.08             | C17H20O10 | 10467564           | 3299716             | 4433605                 | n.d.                     |
| 399.0933 | 400.1005 | 0.10             | C17H20O11 | 8395396            | 2914129             | 3261160                 | n.d.                     |
| 369.0827 | 370.0900 | 0.08             | C16H18O10 | 8092160            | 3388261             | 4086391                 | n.d.                     |
| 413.1089 | 414.1162 | 0.14             | C18H22O11 | 7804542            | 2785488             | n.d.                    | n.d.                     |
| 411.0933 | 412.1006 | 0.01             | C18H20O11 | 7602791            | 2723498             | 3204007                 | n.d.                     |
| 357.0827 | 358.0900 | 0.03             | C15H18O10 | 7592203            | 2662907             | 3968020                 | n.d.                     |
| 439.0881 | 440.0954 | 0.16             | C19H20O12 | 7512791            | 2432750             | 2447354                 | n.d.                     |
| 355.1034 | 356.1107 | 0.14             | C16H20O9  | 7407746            | n.d.                | 3255731                 | n.d.                     |

|          |          |      |           |         |         |         |         |
|----------|----------|------|-----------|---------|---------|---------|---------|
| 371.0984 | 372.1057 | 0.00 | C16H20O10 | 7275802 | 2837495 | 3288355 | n.d.    |
| 455.1195 | 456.1267 | 0.07 | C20H24O12 | 7269488 | n.d.    | n.d.    | n.d.    |
| 441.1039 | 442.1111 | 0.00 | C19H22O12 | 7222973 | 2868715 | n.d.    | n.d.    |
| 425.1089 | 426.1162 | 0.11 | C19H22O11 | 7168753 | n.d.    | n.d.    | n.d.    |
| 341.0878 | 342.0951 | 0.08 | C15H18O9  | 6747876 | 3134911 | 3897085 | 2434621 |
| 453.1038 | 454.1111 | 0.12 | C20H22O12 | 6593772 | n.d.    | 2406249 | n.d.    |
| 397.0776 | 398.0849 | 0.04 | C17H18O11 | 6501022 | 2671858 | 3111391 | 2193452 |
| 353.0878 | 354.0951 | 0.05 | C16H18O9  | 6450178 | 2121895 | 3226963 | n.d.    |
| 343.1035 | 344.1108 | 0.10 | C15H20O9  | 6445792 | 3376469 | 2849745 | n.d.    |
| 427.0882 | 428.0955 | 0.10 | C18H20O12 | 6357749 | 2791190 | 2385821 | n.d.    |
| 381.0827 | 382.0900 | 0.02 | C17H18O10 | 6317424 | n.d.    | 3671348 | n.d.    |
| 385.1140 | 386.1213 | 0.02 | C17H22O10 | 6179959 | 2395168 | 2319179 | n.d.    |
| 395.0983 | 396.1056 | 0.10 | C18H20O10 | 5888724 | n.d.    | 2321874 | n.d.    |
| 369.1191 | 370.1263 | 0.14 | C17H22O9  | 5875214 | n.d.    | 2397832 | n.d.    |
| 469.0986 | 470.1059 | 0.30 | C20H22O13 | 5726904 | n.d.    | 2356961 | n.d.    |
| 423.0933 | 424.1006 | 0.09 | C19H20O11 | 5625559 | n.d.    | 2910152 | n.d.    |
| 409.1140 | 410.1212 | 0.16 | C19H22O10 | 5605991 | n.d.    | n.d.    | n.d.    |
| 385.0776 | 386.0849 | 0.01 | C16H18O11 | 5440103 | 2773519 | 2799931 | n.d.    |
| 359.0984 | 360.1057 | 0.12 | C15H20O10 | 5371828 | 2355527 | n.d.    | n.d.    |
| 313.0929 | 314.1002 | 0.01 | C14H18O8  | 5365061 | 2148448 | 2821374 | n.d.    |
| 357.1192 | 358.1264 | 0.11 | C16H22O9  | 5332247 | 2172810 | n.d.    | n.d.    |
| 329.0878 | 330.0951 | 0.05 | C14H18O9  | 5298957 | 2298886 | n.d.    | n.d.    |
| 429.1038 | 430.1111 | 0.11 | C18H22O12 | 4991751 | n.d.    | n.d.    | n.d.    |

|          |          |      |           |         |         |         |      |
|----------|----------|------|-----------|---------|---------|---------|------|
| 355.0671 | 356.0744 | 0.09 | C15H16O10 | 4947575 | 3651776 | 3632803 | n.d. |
| 327.0722 | 328.0795 | 0.10 | C14H16O9  | 4933566 | 3004260 | 2717836 | n.d. |
| 299.0772 | 300.0845 | 0.00 | C13H16O8  | 4925967 | 2173501 | 2424283 | n.d. |
| 415.0881 | 416.0954 | 0.24 | C17H20O12 | 4901508 | n.d.    | n.d.    | n.d. |
| 457.0988 | 458.1060 | 0.02 | C19H22O13 | 4825555 | n.d.    | 2379698 | n.d. |
| 451.0881 | 452.0953 | 0.32 | C20H20O12 | 4802902 | n.d.    | 2787023 | n.d. |
| 301.0929 | 302.1002 | 0.03 | C13H18O8  | 4752112 | n.d.    | n.d.    | n.d. |
| 481.0986 | 482.1059 | 0.32 | C21H22O13 | 4731657 | n.d.    | 2383353 | n.d. |
| 401.1089 | 402.1162 | 0.13 | C17H22O11 | 4638836 | n.d.    | 2205407 | n.d. |
| 367.0670 | 368.0743 | 0.13 | C16H16O10 | 4574968 | n.d.    | 2620109 | n.d. |
| 383.0620 | 384.0693 | 0.02 | C16H16O11 | 4529372 | n.d.    | n.d.    | n.d. |
| 325.0929 | 326.1002 | 0.07 | C15H18O8  | 4500623 | n.d.    | 3169129 | n.d. |
| 409.0776 | 410.0848 | 0.17 | C18H18O11 | 4447316 | 2266750 | 2461946 | n.d. |
| 413.0725 | 414.0798 | 0.10 | C17H18O12 | 4349547 | n.d.    | 2393404 | n.d. |
| 339.0722 | 340.0795 | 0.17 | C15H16O9  | 4346112 | n.d.    | 2732871 | n.d. |
| 387.0933 | 388.1006 | 0.06 | C16H20O11 | 4278272 | n.d.    | n.d.    | n.d. |
| 315.1086 | 316.1159 | 0.13 | C14H20O8  | 4187648 | n.d.    | n.d.    | n.d. |
| 315.0722 | 316.0794 | 0.02 | C13H16O9  | 4089852 | n.d.    | n.d.    | n.d. |
| 483.1142 | 484.1215 | 0.45 | C21H24O13 | 3893654 | n.d.    | n.d.    | n.d. |
| 283.0823 | 284.0896 | 0.04 | C13H16O7  | 3875739 | n.d.    | n.d.    | n.d. |
| 437.0726 | 438.0799 | 0.14 | C19H18O12 | 3658983 | n.d.    | 2659726 | n.d. |
| 399.1297 | 400.1369 | 0.03 | C18H24O10 | 3635862 | n.d.    | n.d.    | n.d. |
| 311.0772 | 312.0845 | 0.13 | C14H16O8  | 3240850 | n.d.    | n.d.    | n.d. |

|          |          |      |           |         |         |         |      |
|----------|----------|------|-----------|---------|---------|---------|------|
| 411.0568 | 412.0641 | 0.23 | C17H16O12 | 3039316 | 2236188 | n.d.    | n.d. |
| 343.0671 | 344.0743 | 0.06 | C14H16O10 | 2969814 | n.d.    | 2227396 | n.d. |
| 443.0831 | 444.0904 | 0.04 | C18H20O13 | 2921606 | n.d.    | n.d.    | n.d. |
| 371.0621 | 372.0693 | 0.19 | C15H16O11 | 2826251 | n.d.    | n.d.    | n.d. |
| 345.0828 | 346.0900 | 0.14 | C14H18O10 | 2779881 | 2401146 | 2198964 | n.d. |
| 313.0565 | 314.0638 | 0.02 | C13H14O9  | 2141122 | n.d.    | n.d.    | n.d. |
